# Supplementary material for: Influence of alkenyl structures on the epoxidation of unsaturated fatty acid methyl esters and vegetable oils
Source: Royal Society of Chemistry journal article supplement (doi:10.1039/c5ra11035a), 2015-01-01
Supplement: c5ra11035a1.pdf [file c5ra11035a1.pdf]

## **Supplementary Information**

### **Influence of the alkenyl structures on the epoxidation of unsaturated fatty acid methyl esters and vegetable oils**

**Supplementary figures**

已检索库: C:\Database\NIST05a.L  
质量 : 99  
ID : 9-Octadecenoic acid, methyl ester, (E)-

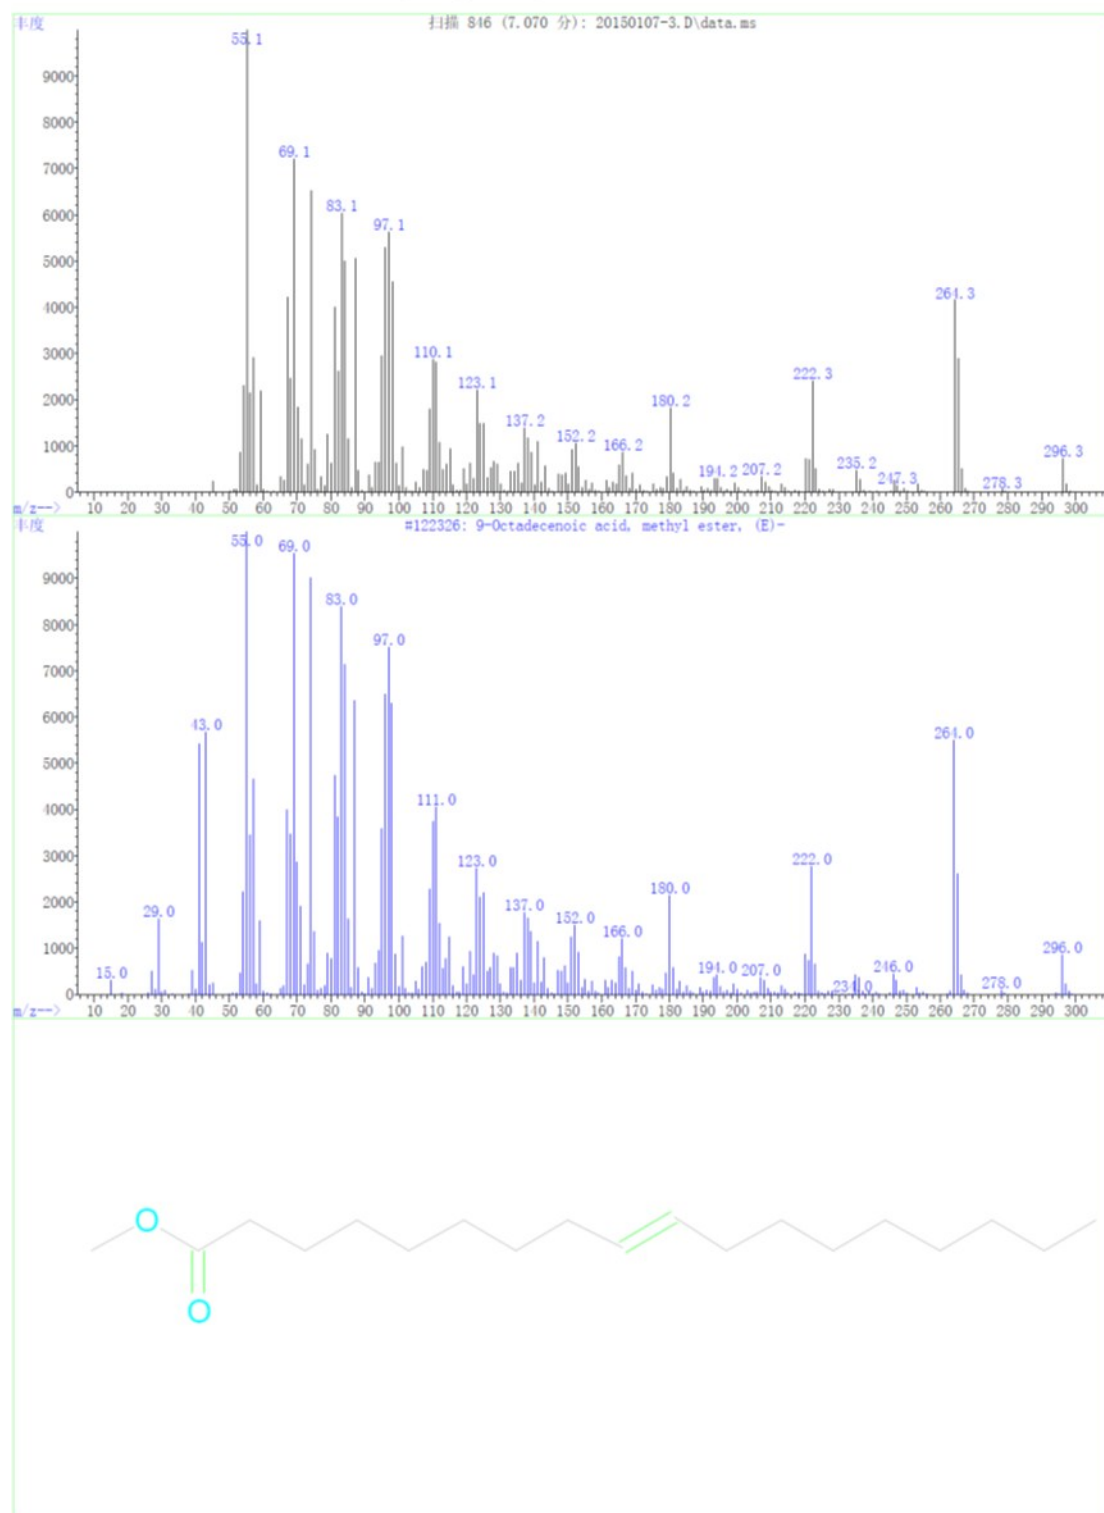

**Fig. S1 GC-MS results of 1 in the trace of the epoxidation of methyl oleate**

已检索库: C:\Database\NIST05a.L

质量 : 90

ID : Oxiraneoctanoic acid, 3-octyl-, methyl ester, cis-

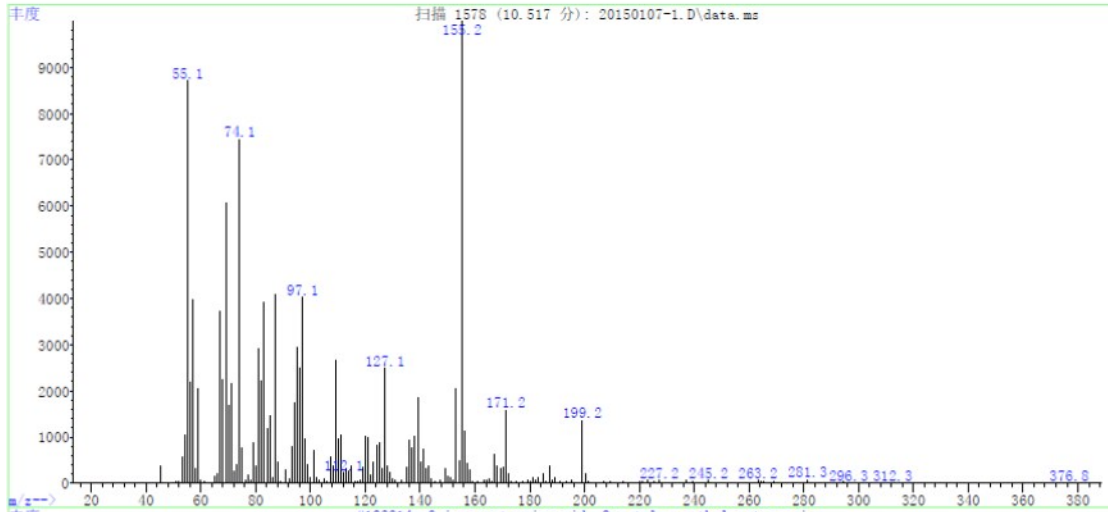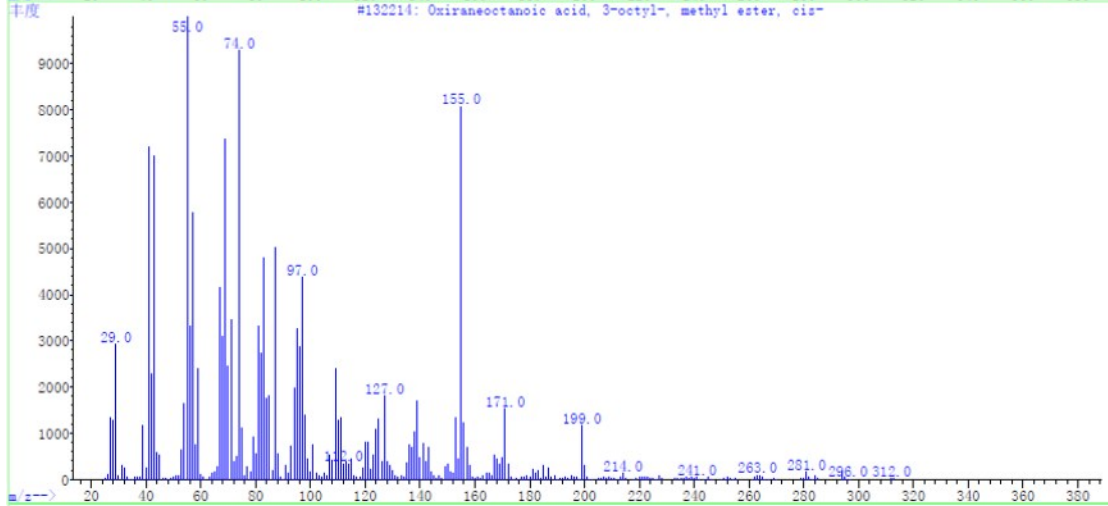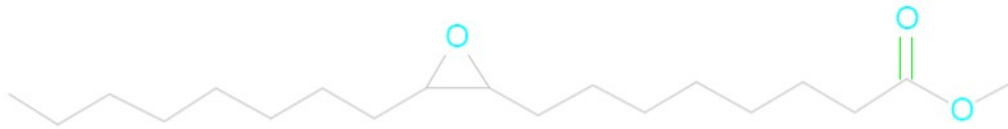

Fig. S2 GC-MS results of 2 in the trace of the epoxidation of methyl oleate

已检索库: C:\Database\NIST05a.L  
质量 : 46  
ID : Octadecanoic acid, 10-oxo-, methyl ester

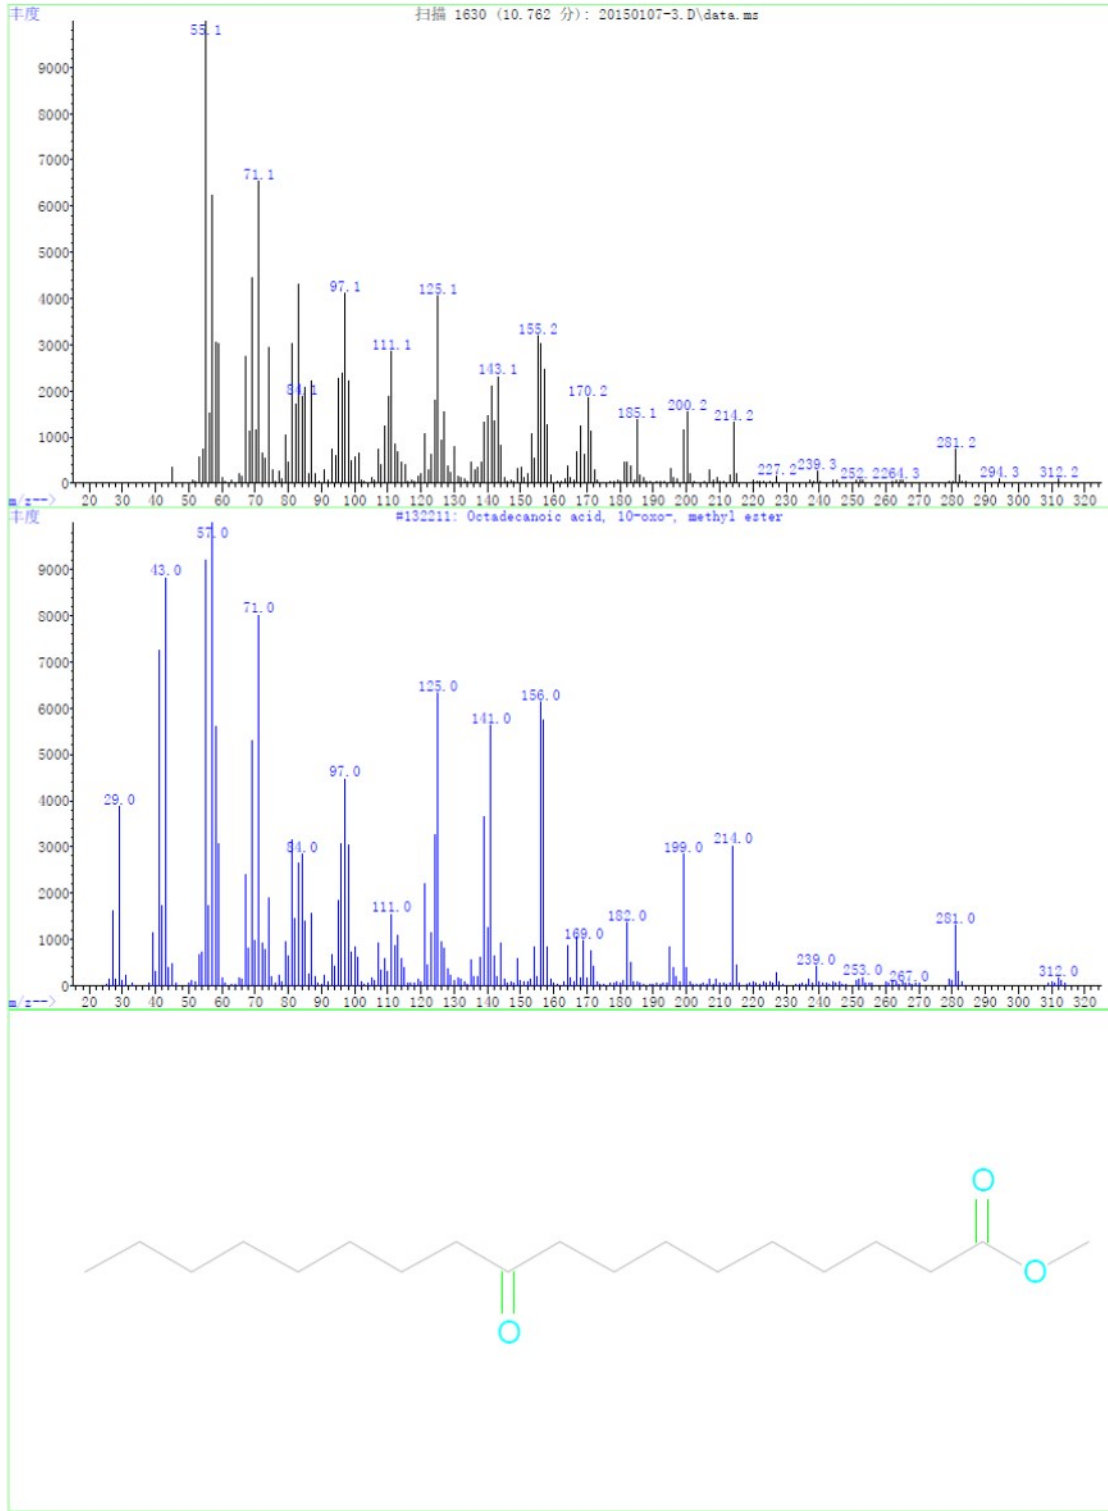

Fig. S3 GC-MS results of 3 for the epoxidation of methyl oleate

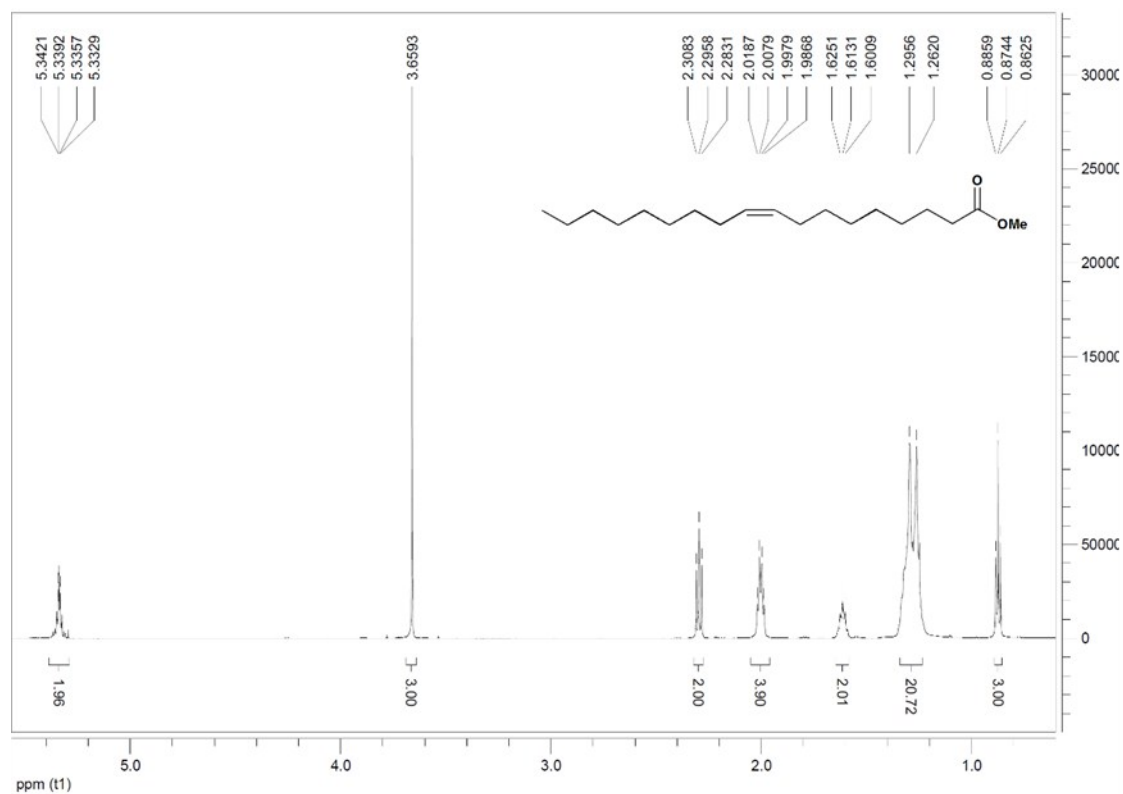

**Fig. S4  $^1\text{H-NMR}$  spectra of 1 for the epoxidation of methyl oleate**

$^1\text{H-NMR}$  (600MHz,  $\text{CDCl}_3$ ):  $\delta$  (ppm) = 5.34(m,  $-\text{CH}=\text{CH}-$ ), 3.66(s,  $-\text{OCH}_3$ ), 2.30(t,  $J=7.56\text{Hz}$ ,  $-\text{CH}_2-\text{CO}-$ ), 2.02(m,  $-\text{CH}_2-\text{CH}=\text{CH}-\text{CH}_2-$ ), 1.62(t,  $J=7.26\text{Hz}$ ,  $-\text{CH}_2-\text{CH}_3$ ), 1.29(m,  $-(\text{CH}_2)_n-$ ) and 0.87(t,  $J=7.02\text{Hz}$ ,  $-\text{CH}_3$ ).

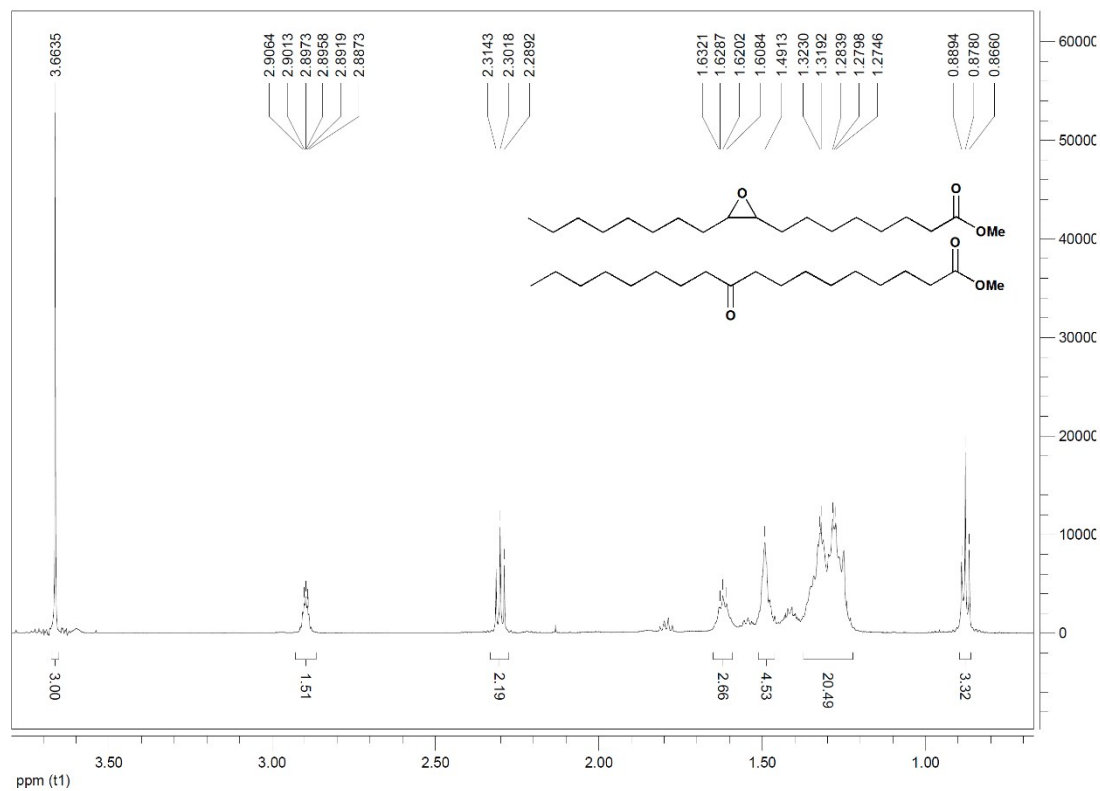

**Fig. S5  $^1\text{H-NMR}$  spectra of 2 from epoxidation of methyl oleate**

$^1\text{H-NMR}$  (600MHz,  $\text{CDCl}_3$ ):  $\delta$  (ppm) = 3.66(s,  $-\text{OCH}_3$ ), 2.89(m,  $-\text{CHOCH-/-CH}_2\text{-CO-CH}_2-$ ), 2.30(t,  $J=7.53\text{Hz}$ ,  $-\text{CH}_2\text{-CO-}$ ), 1.49(m,  $-\text{CH}_2\text{-CH=CH-CH}_2-$ ), 1.62(m,  $-\text{CH}_2\text{-CH}_3$ ), 1.29(m,  $-(\text{CH}_2)_n-$ ) and 0.87(t,  $J=7.02\text{Hz}$ ,  $-\text{CH}_3$ ).

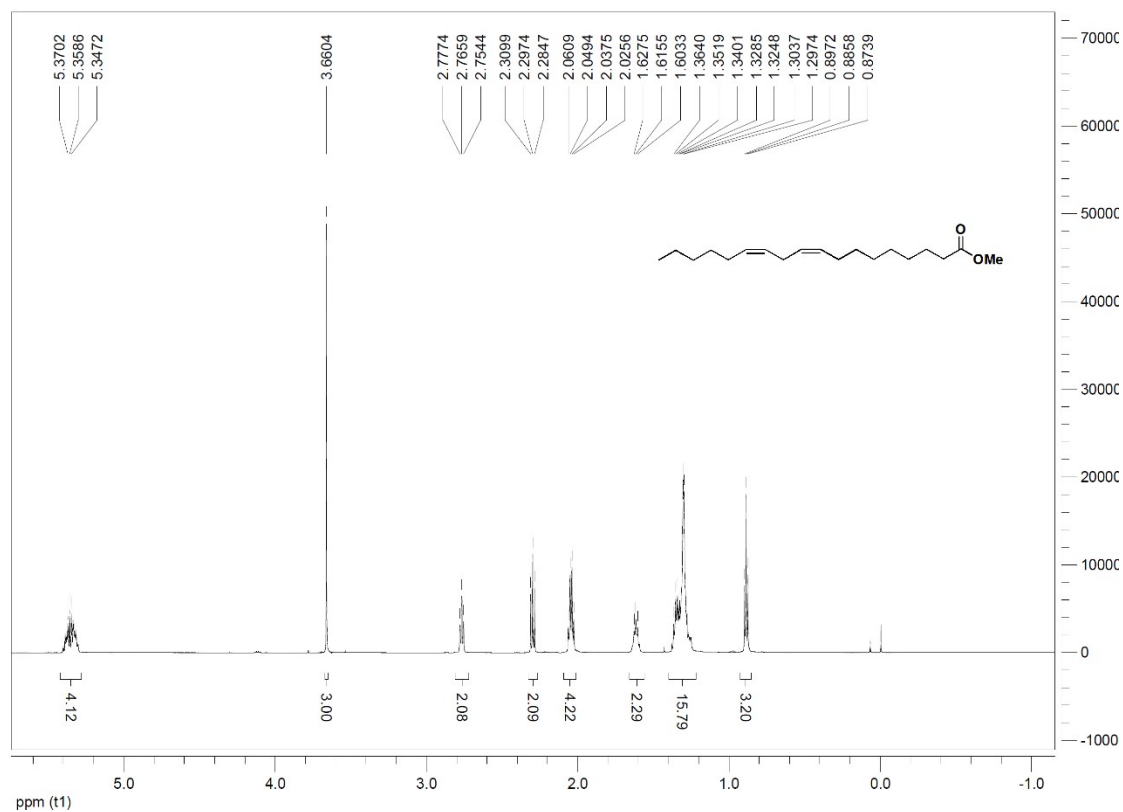

**Fig. S6  $^1\text{H-NMR}$  spectra of 4 for the epoxidation of methyl linoleate**

$^1\text{H-NMR}$  (600MHz,  $\text{CDCl}_3$ ):  $\delta$  (ppm) = 5.35(m,  $-\text{CH=CH-}$ ), 3.66(s,  $-\text{OCH}_3$ ), 2.76(t,  $J=6.90\text{Hz}$ ,  $-\text{CH=CH-CH}_2\text{-CH=CH-}$ ), 2.30(t,  $J=7.56\text{Hz}$ ,  $-\text{CH}_2\text{-CO-}$ ), 2.07(m,  $-\text{CH}_2\text{-CH=CH-CH}_2\text{-CH=CH-CH}_2-$ ) 1.62(t,  $J=7.26\text{Hz}$ ,  $-\text{CH}_2\text{-CH}_3$ ), 1.30(m,  $-(\text{CH}_2)_n-$ ) and 0.87(t,  $J=6.99\text{Hz}$ ,  $-\text{CH}_3$ ).

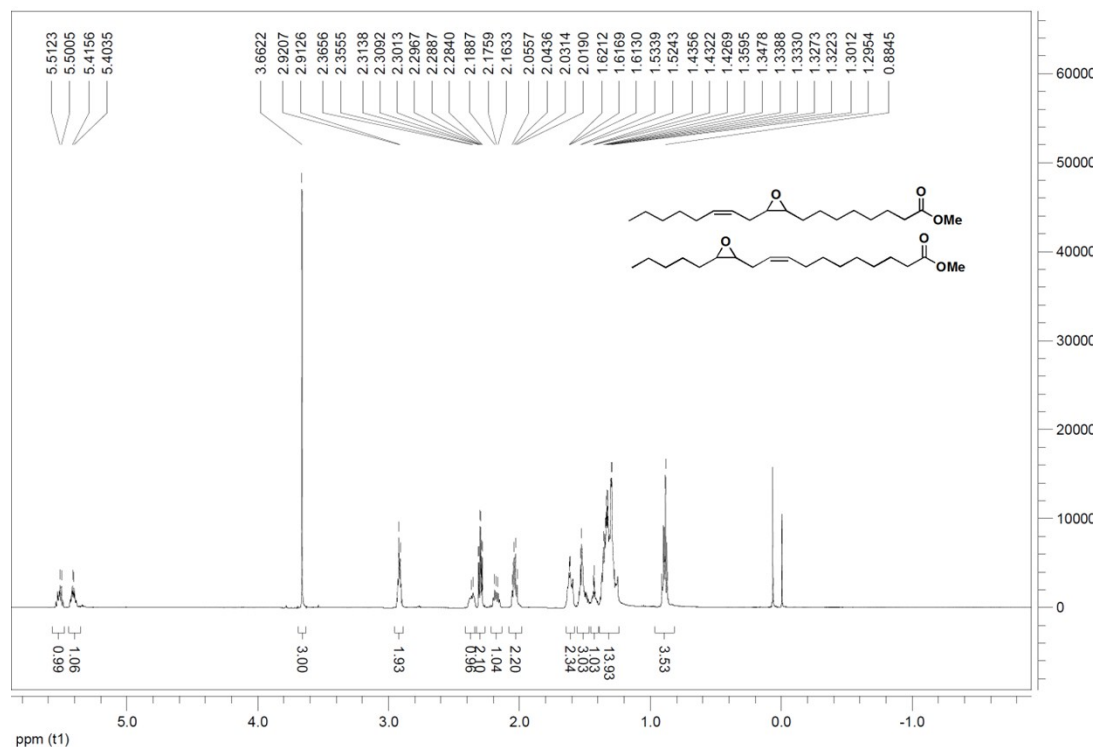

**Fig. S7**  $^1\text{H-NMR}$  spectra of **5** for the epoxidation of methyl linoleate

$^1\text{H-NMR}$  (600MHz,  $\text{CDCl}_3$ ):  $\delta$  (ppm) = 5.40(m,  $-\text{CH}=\text{CH}-$ ), 3.66(s,  $-\text{OCH}_3$ ), 2.91(m,  $-\text{CH-O-CH-}$ ), 2.35(m,  $-\text{CH}_2-\text{CH-O-CH-}$ ), 2.29(m,  $-\text{CH}_2-\text{CO-}$ ), 2.05(m,  $-\text{CH}_2-\text{CH}=\text{CH}-\text{CH}_2-\text{CH-O-CH-CH}_2-$ ), 1.61(m,  $-\text{CH}_2-\text{CH}_3$ ), 1.30(m,  $-(\text{CH}_2)_n-$ ) and 0.87(m,  $-\text{CH}_3$ ).

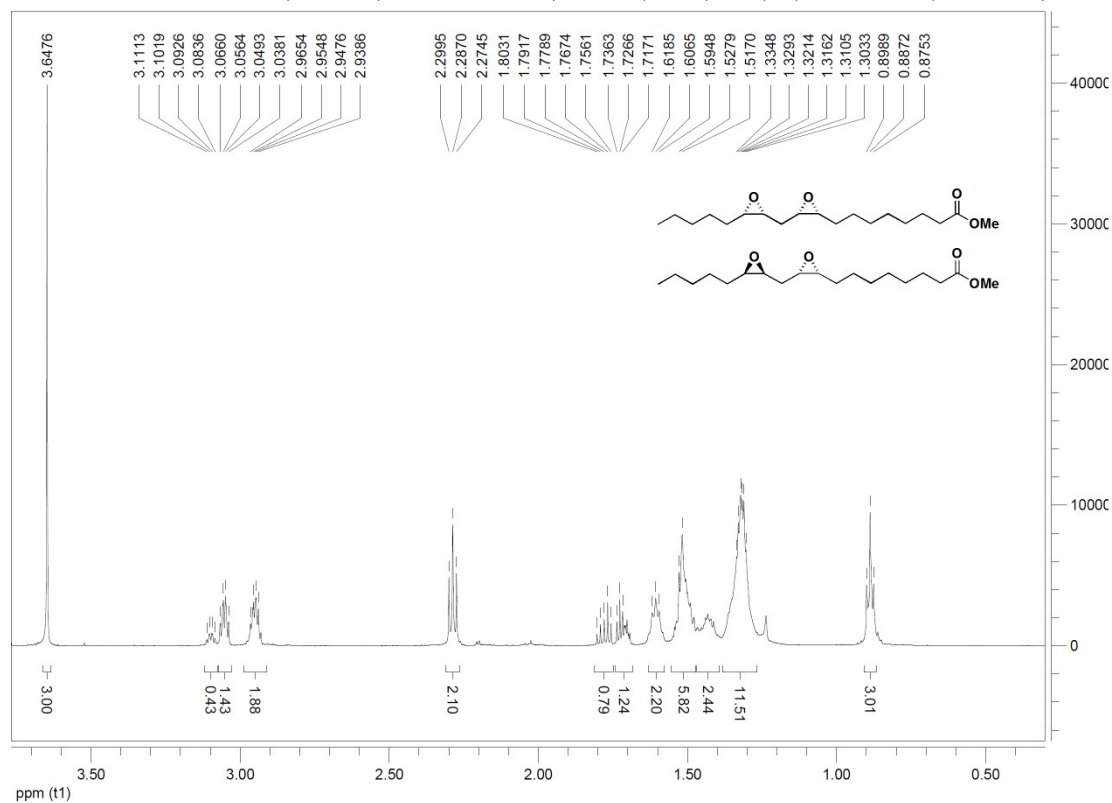

**Fig. S8**  $^1\text{H-NMR}$  spectra of **5** for the epoxidation of methyl linoleate

$^1\text{H-NMR}$  (600MHz,  $\text{CDCl}_3$ ):  $\delta$  (ppm) = 3.65(s,  $-\text{OCH}_3$ ), 2.96-3.09(m,  $-\text{CH-O-CH-}$ ), 2.29(t,  $J=7.50\text{Hz}$ ,  $-\text{CH}_2\text{-CO-}$ ), 1.60(m,  $-\text{CH}_2\text{-CH-O-CH-CH}_2\text{-CH-O-CH-CH}_2\text{-}$ ), 1.31(m,  $-(\text{CH}_2)_n\text{-}$ ) and 0.88(t,  $J=7.08\text{Hz}$ ,  $-\text{CH}_3$ ).

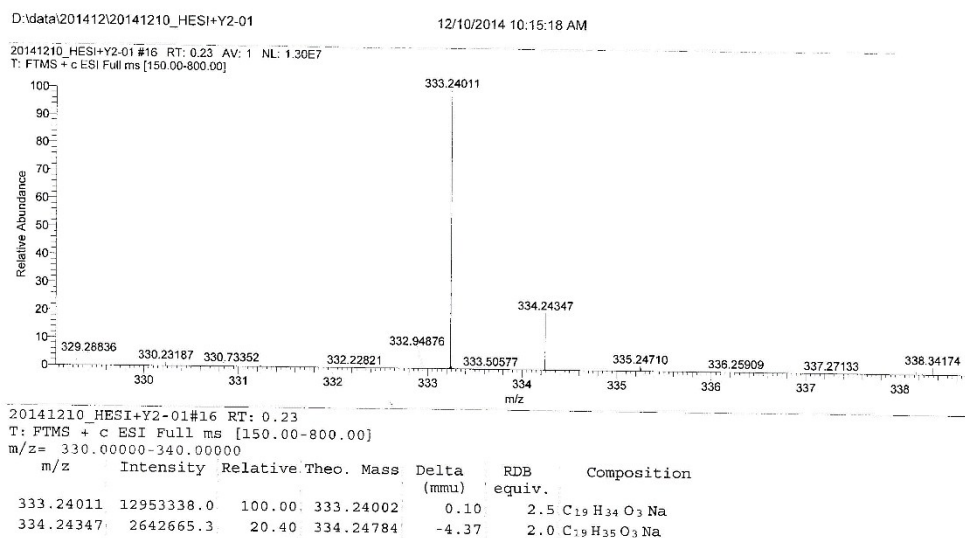

**Fig. S9 HRMS spectrum of 5 for the epoxidation of methyl linoleate**

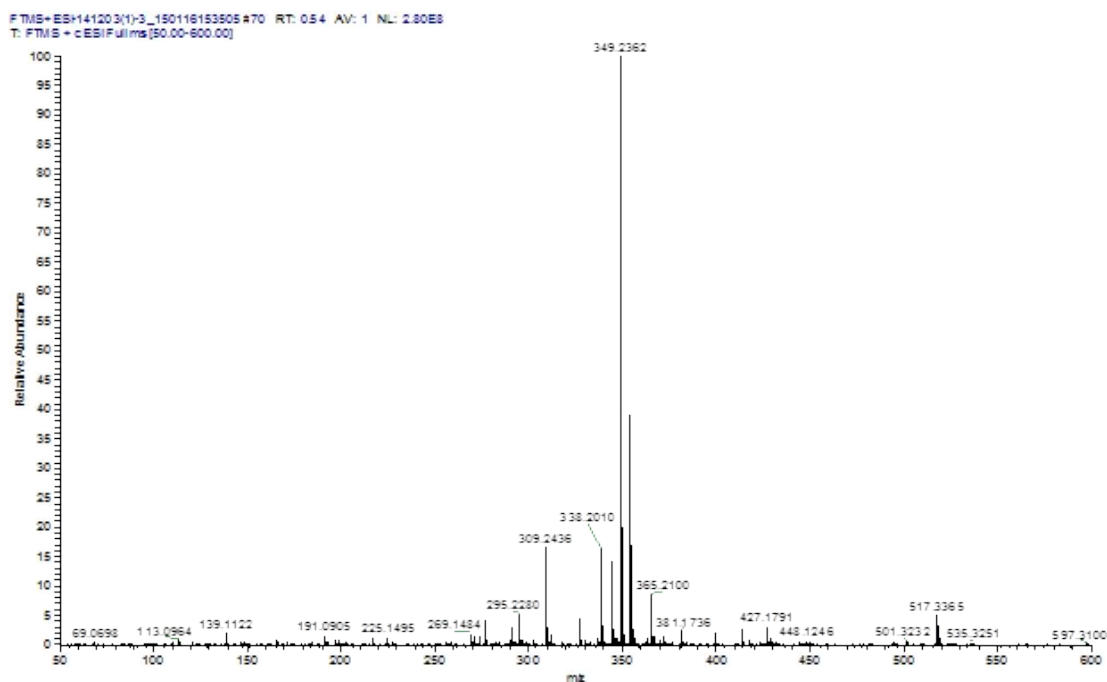

**Fig. S10 HRMS spectrum of 6 for the epoxidation of methyl linoleate**



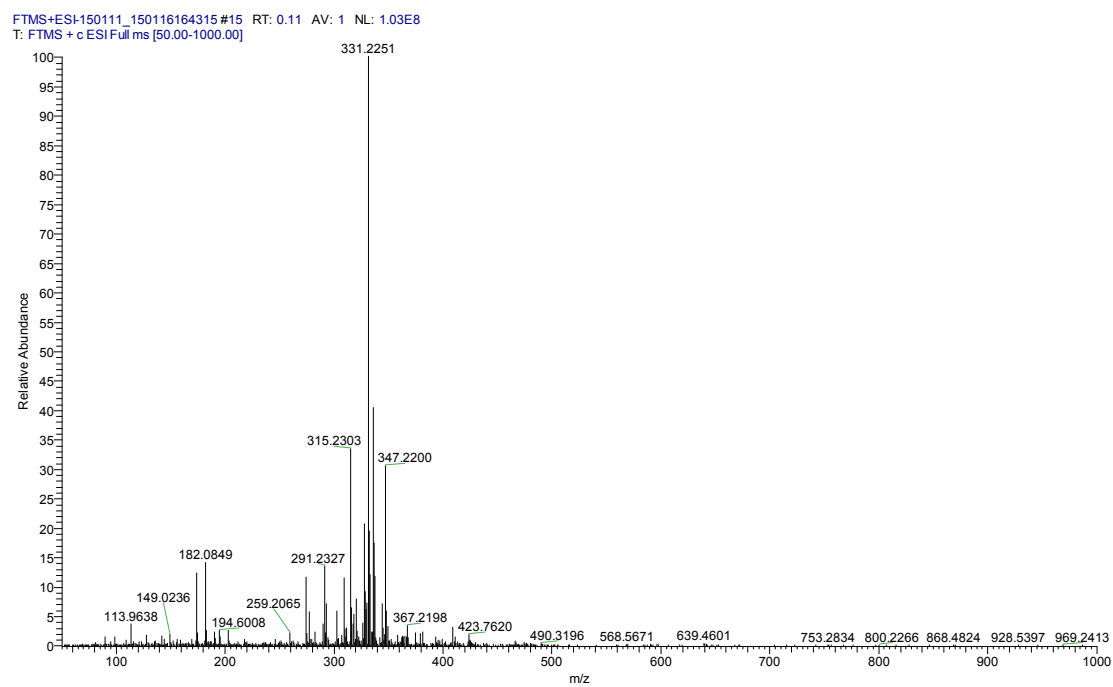

**Fig. S11 HRMS spectrum for the epoxidation of methyl linolenate**
